# Supplementary material for: Multiscale Analysis of Water Area, Level and Flow and Their Relationships for a Large Lake Connected to Rivers: A Case Study of Dongting Lake, China
Source: MDPI journal article supplement (doi:10.3390/w16091198), 2024-04-23
Supplement: s1 [file s1]

Archive with 1 entries (1 files):
- water-2941666-supplementary.pdf
