# Supplementary material for: Multiscale Analysis of Water Area, Level and Flow and Their Relationships for a Large Lake Connected to Rivers: A Case Study of Dongting Lake, China
Source: MDPI journal article supplement (doi:10.3390/w16091198), 2024-04-23
Supplement: s1 [file s1 › water-2941666-supplementary.pdf]

# Supplementary file

## Multiscale analysis of water area, level and flow and their relationships for a large lake connected to rivers: A case study of Dongting Lake, China

Shan Xu <sup>1,\*</sup>, Liang Zhai <sup>2</sup>, Bin Zou <sup>3</sup>, Huiyong Sang <sup>2</sup>

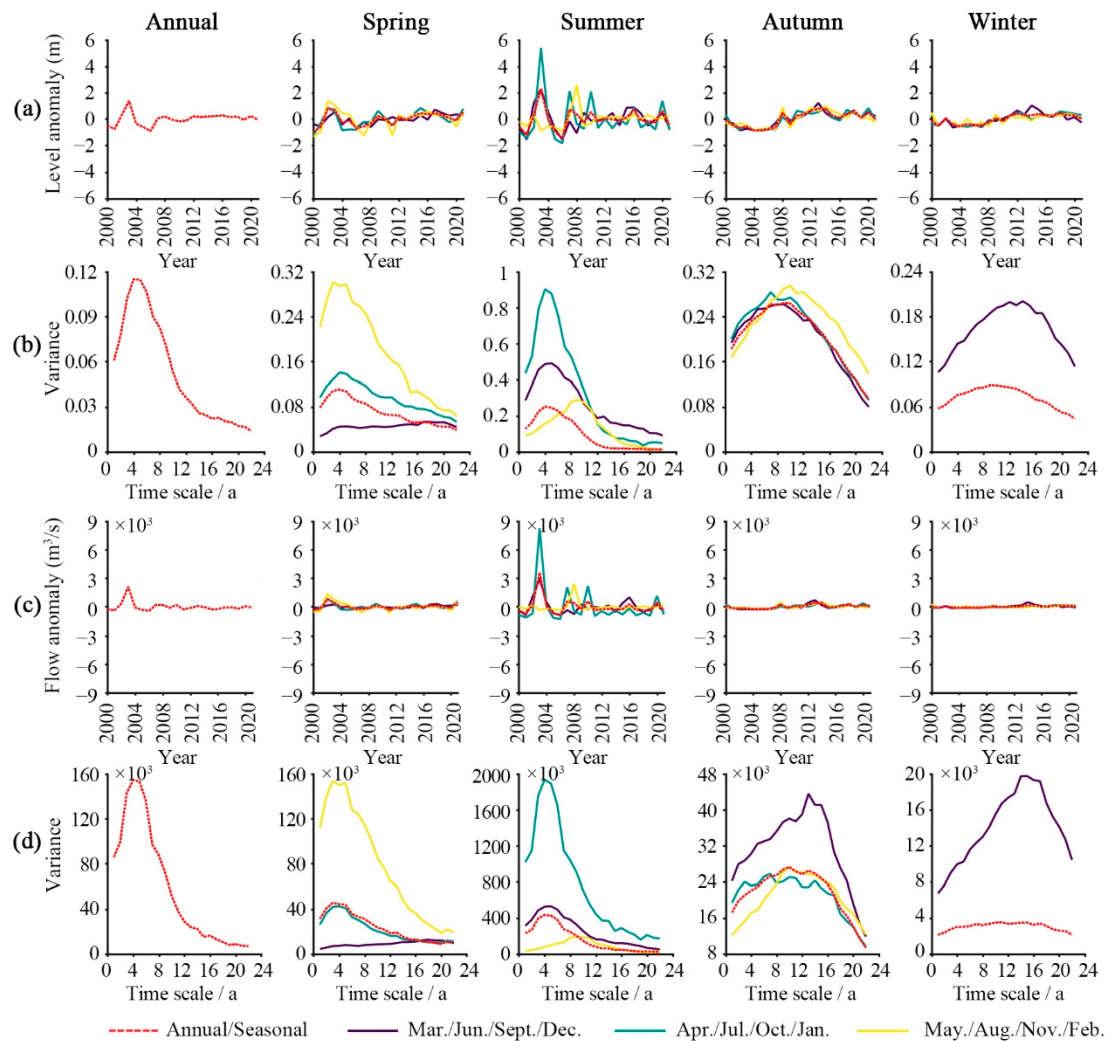

**Figure S1.** Annual/ seasonal/ monthly (a) water level anomalies, (b) wavelet variance of water level anomalies, (c) water flow anomalies, (d) wavelet variance of water flow anomalies at Shimen station of Dongting Lake

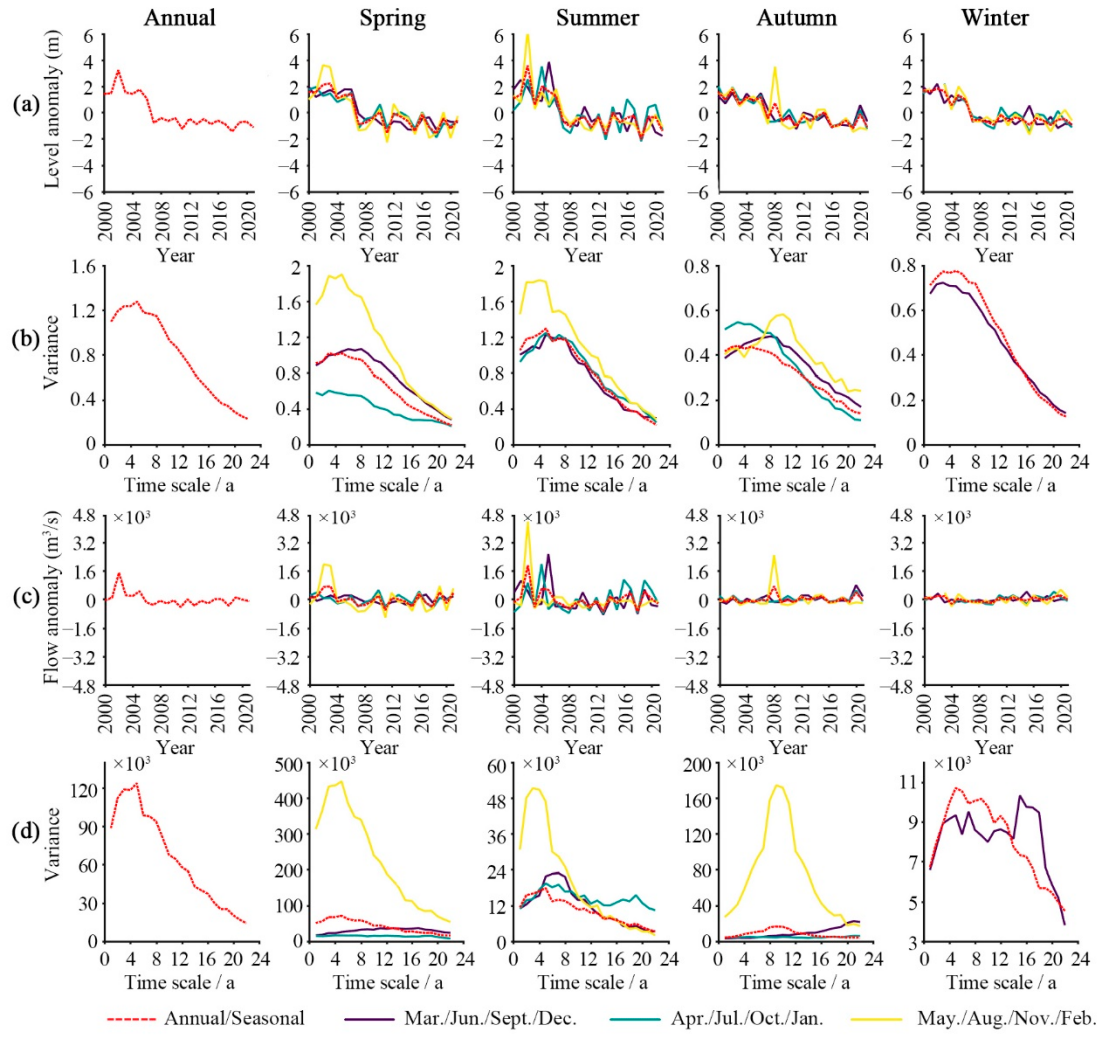

**Figure S2.** Annual/ seasonal/ monthly (a) water level anomalies, (b) wavelet variance of water level anomalies, (c) water flow anomalies, (d) wavelet variance of water flow anomalies at Taojiang station of Dongting Lake

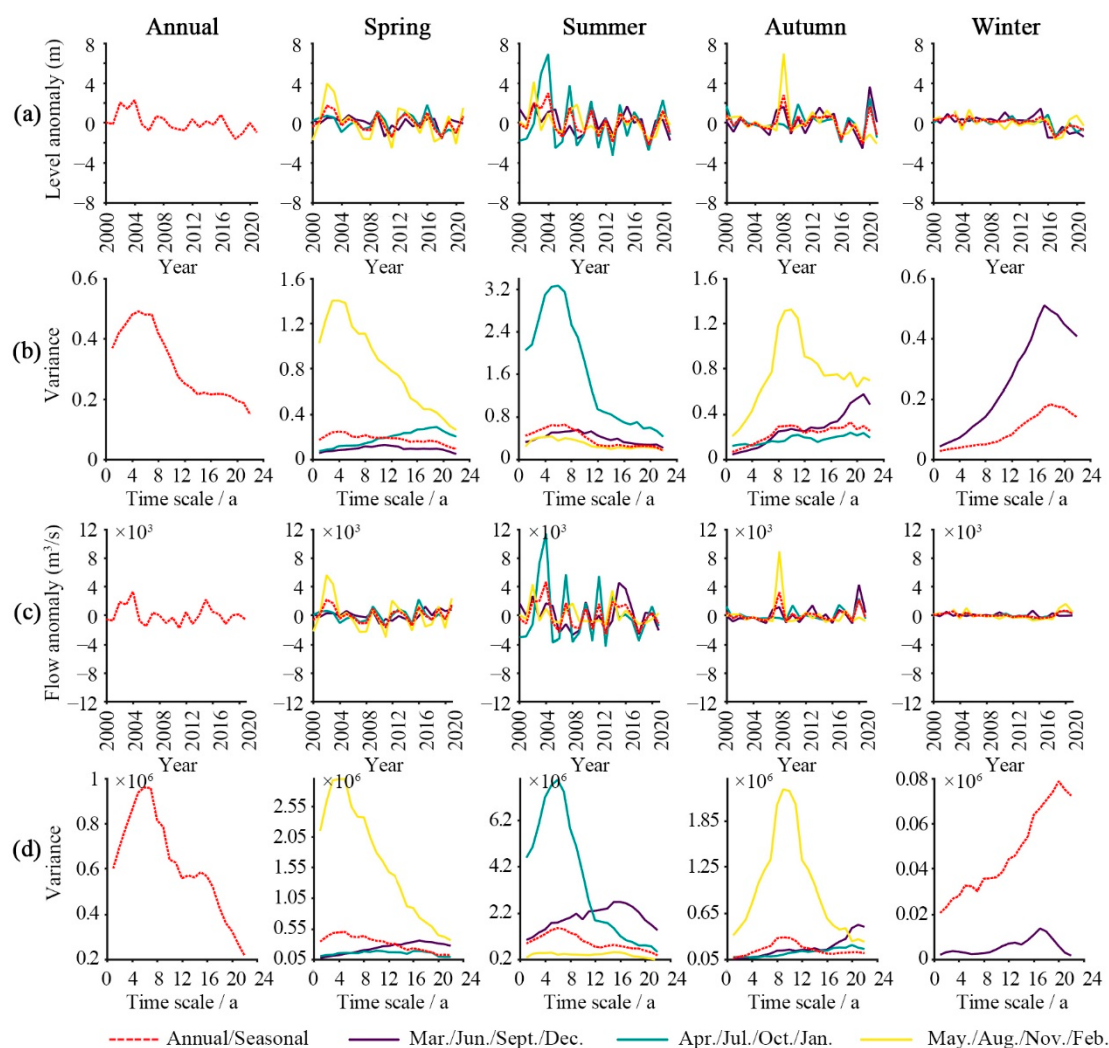

**Figure S3.** Annual/ seasonal/ monthly (a) water level anomalies, (b) wavelet variance of water level anomalies, (c) water flow anomalies, (d) wavelet variance of water flow anomalies at Taoyuan station of Dongting Lake
